# Supplementary material for: Diversity of Indigenous Saccharomyces Cerevisiae Yeast Strains in Cabernet Sauvignon Fermentations From “Utiel-Requena” (Spain) Region as a Resource to Improve Wine Distinctiveness
Source: Preprints.org preprint supplement (doi:10.20944/preprints202306.0465.v1), 2023-06-06
Supplement: Supplementary file 2 [file supplementary]

Figure S1. Consumed glucose expressed as g/L on days 3 (A), 7 (B) and 21 (C). Different letters in the columns mean a significant difference (p < 0.01) between the values.

Figure S2. Consumed fructose expressed as g/L on days 3 (A), 7 (B) and 21 (C). Different letters in the columns mean a significant difference (p < 0.01) between the values.

Figure S3. Produced ethanol expressed as % (vv-1) on days 3 (A), 7 (B) and 21 (C). Different letters in the columns mean a significant difference (p < 0.01) between the values.

Figure S4. Produced glycerol expressed as g/L on days 3 (A), 7 (B) and 21 (C). Different letters in the columns mean a significant difference (p < 0.01) between the values.

Figure S5. Produced acetic acid expressed as g/L on days 3 (A), 7 (B) and 21 (C). Different letters in the columns mean a significant difference (p < 0.01) between the values.

Figure S6. Ethanol yields from consumed sugars (glucose +fructose) on days 3 (A), 7 (B) and 21 (C). Different letters in the columns mean a significant difference (p < 0.01) between the values.

**Figure S1.**

**Figure S2**

**Figure S3**

**Figure S4**

**Figure S5**

**Figure S6.**
